# Supplementary material for: The C250T Mutation of TERTp Might Grant a Better Prognosis to Glioblastoma by Exerting Less Biological Effect on Telomeres and Chromosomes Than the C228T Mutation
Source: Cancers (Basel). 2024 Feb 9;16(4):735. doi: 10.3390/cancers16040735 (PMC10886885; doi:10.3390/cancers16040735)

## **C250T mutation of *TERTp* might grant a better prognosis to glioblastoma by exerting less biological effect on telomeres and chromosomes than the C228T mutation**

Teresa Gorria, Carme Crous, Estela Pineda, Ainhoa Hernandez, Marta Domenech, Carolina Sanz, Pedro Jares, Ana M<sup>a</sup> Muñoz-Marmol, Oriol Arpí -Llucía, Bárbara Melendez, Marta Gut, Anna Esteve, Anna Esteve-Codina, Genis Parra, Francesc Alameda, Cristina Carrato, Iban Aldecoa, Mar Mallo, Nuria de la Iglesia, Carmen Balana

### **Supplementary Data**

**Supplementary Table S1.** Progression-free survival (PFS) and overall survival (OS) according to *MGMTp* methylation status and *MGMTp* and *TERTp* status.

**Supplementary Figure S1.** (A) Progression-free survival and (B) overall survival according to *TERTp* mutation status (wild-type vs mutated)

**Supplementary Figure S2.** Overall survival according to *TERTp* mutation status (A) C250T mutation vs C228T mutation vs wild-type and (B) C250 mutation vs C228T mutation and wild-type

**Supplementary Figure S3.** Progression-free survival according to *TERTp* mutation status (A) C250T mutation vs C228T mutation vs wild-type and (B) C250 mutation vs C228T mutation and wild-type

**Supplementary Figure S4.** TERT RNA expression was assessed in relation to *TERTp* mutation status using the Kruskal-Wallis test. The results indicated no statistically significant differences across all comparative statuses (C228T vs C250T vs wt:  $p=0.25$ , C228T vs wt:  $p=0.1$ , C228T vs C250T:  $p=0.71$ , C250T vs wt:  $p=0.35$ ), as all  $p$ -values exceeded the threshold of 0.05.

**Supplementary Table S1. Progression-free survival (PFS) and overall survival (OS) according to *MGMTp* methylation status and *MGMTp* and *TERTp* status.**

| Comparisons                                                        |                     | PFS             |          | OS               |          |
|--------------------------------------------------------------------|---------------------|-----------------|----------|------------------|----------|
|                                                                    |                     | Months (95% CI) | <i>P</i> | Months (95% CI)  | <i>P</i> |
| <b><i>MGMTp</i> status</b>                                         | Met                 | 8.8 (7.1-11.5)  | 0.002    | 18.8 (13.9-23.7) | 0.023    |
|                                                                    | UnMet               | 7.4 (6.5-8.3)   |          | 15.8 (13.5-18.1) |          |
| <b><i>MGMTp</i> status &amp; <i>TERTp</i> wt vs mut</b>            | Met & wt            | 7.7 (6.3-16.1)  | 0.01     | 13.9 (9.8-NR)    | 0.146    |
|                                                                    | Met & C228T+C250T   | 9.4 (7.8-11.5)  |          | 19.6 (14.2-24.6) |          |
|                                                                    | UnMet & C228T+C250T | 7.7 (6.9-9.2)   |          | 15.9 (13.7-17.1) |          |
|                                                                    | UnMet & wt          | 6.8 (6-11.5)    |          | 15 (11.9-27.2)   |          |
| <b><i>MGMTp</i> status &amp; <i>TERTp</i> C250T vs C228T vs wt</b> | Met & C250T         | 12.1 (9.8-22.3) | 0.008    | 24.8 (21.7-NR)   | 0.021    |
|                                                                    | UnMet & C250T       | 7.9 (6.6-13)    |          | 18 (13.2-32.7)   |          |
|                                                                    | Met & C228T         | 8.6 (7.3-11.8)  |          | 16 (13.4-21.5)   |          |
|                                                                    | UnMet & C228T       | 7.7 (6.7-9.4)   |          | 14.8 (13.2-16.9) |          |
|                                                                    | Met & wt            | 7.7 (6.3-16.1)  |          | 13.9 (9.8-NR)    |          |
|                                                                    | UnMet & wt          | 6.8 (6-11.5)    |          | 15 (11.9-27.2)   |          |
|                                                                    |                     |                 |          |                  |          |
|                                                                    |                     |                 |          |                  |          |

**Supplementary Figure S1. (A)** Progression-free survival and **(B)** overall survival according to *TERTp* mutation status (wild-type vs mutated)

**A**

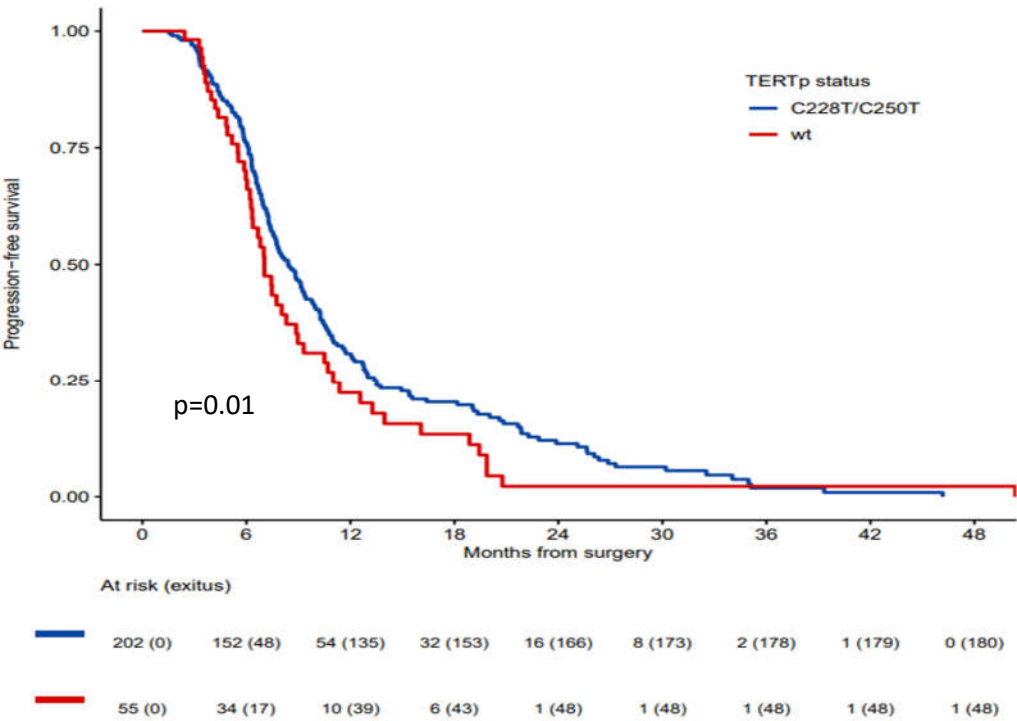

**B**

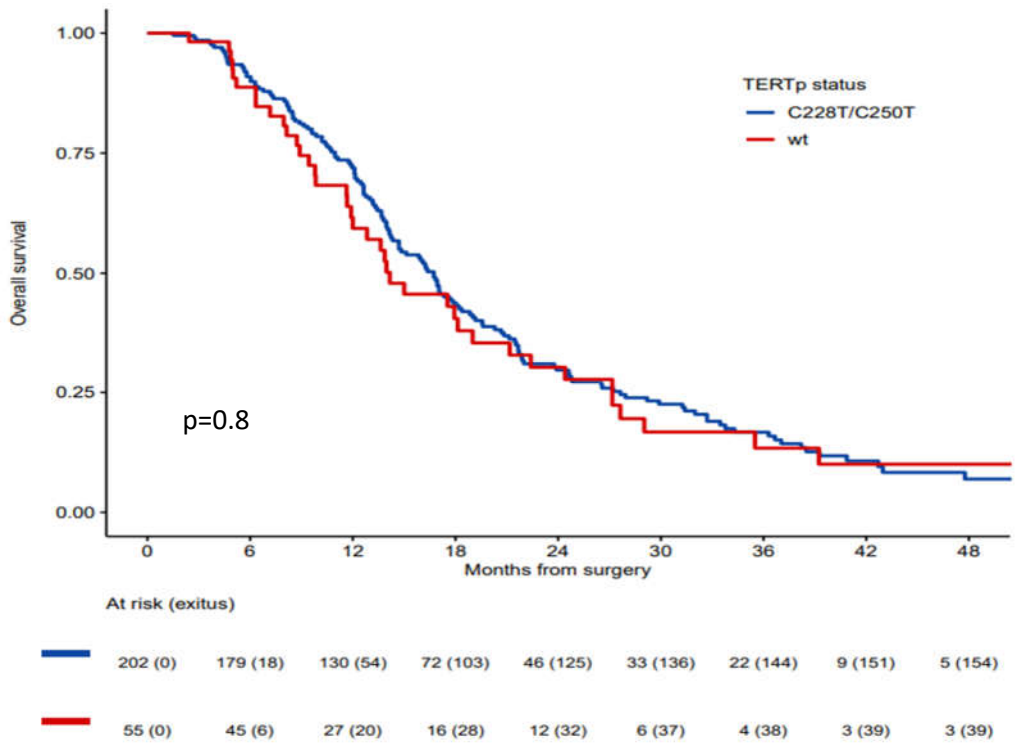

**Supplementary Figure S2.** Overall survival according to *TERTp* mutation status **(A)** C250T mutation vs C228T mutation vs wild-type and **(B)** C250 mutation vs C228T mutation and wild-type

**A**

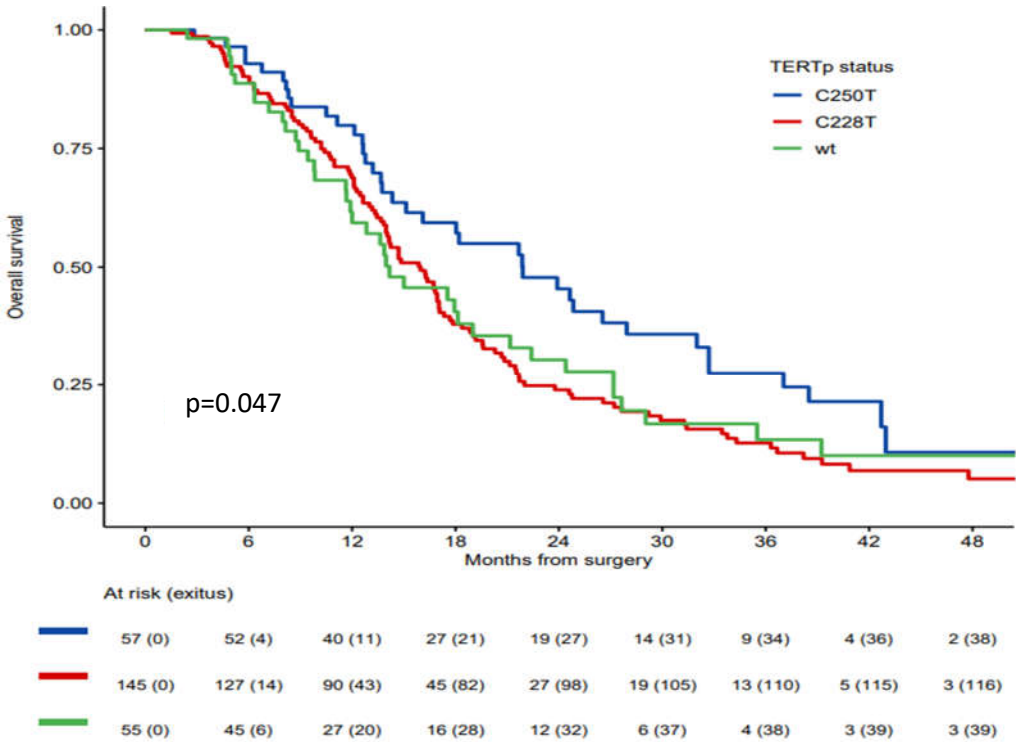

**B**

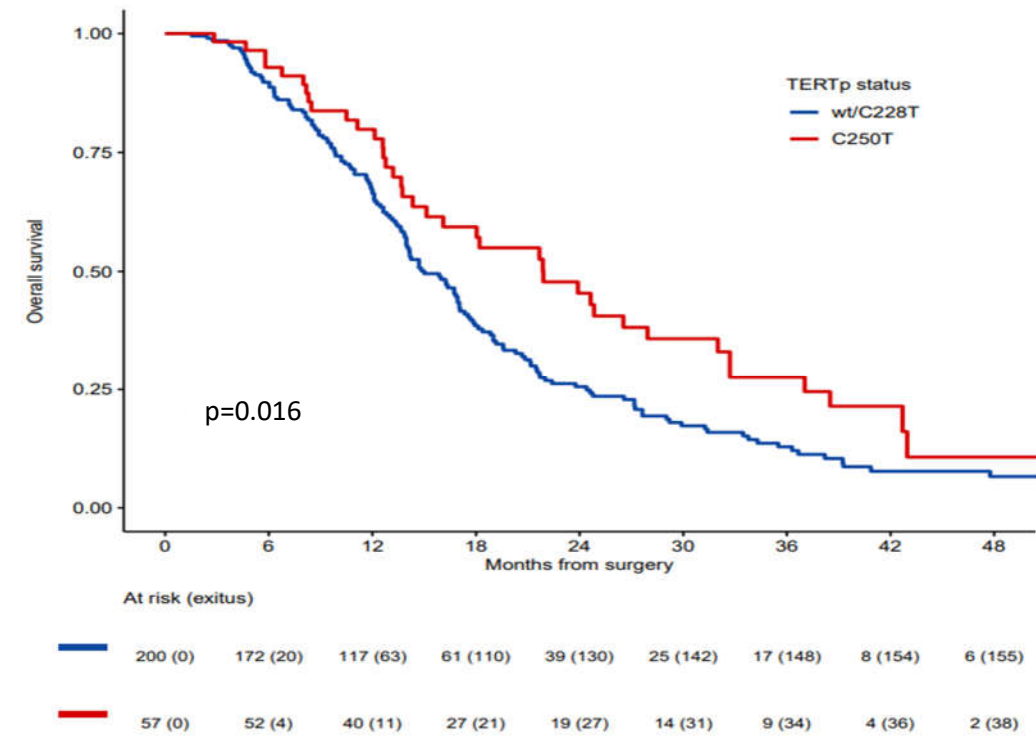

**Supplementary Figure S3.** Progression-free survival according to *TERTp* mutation status **(A)** C250T mutation vs C228T mutation vs wild-type and **(B)** C250 mutation vs C228T mutation and wild-type

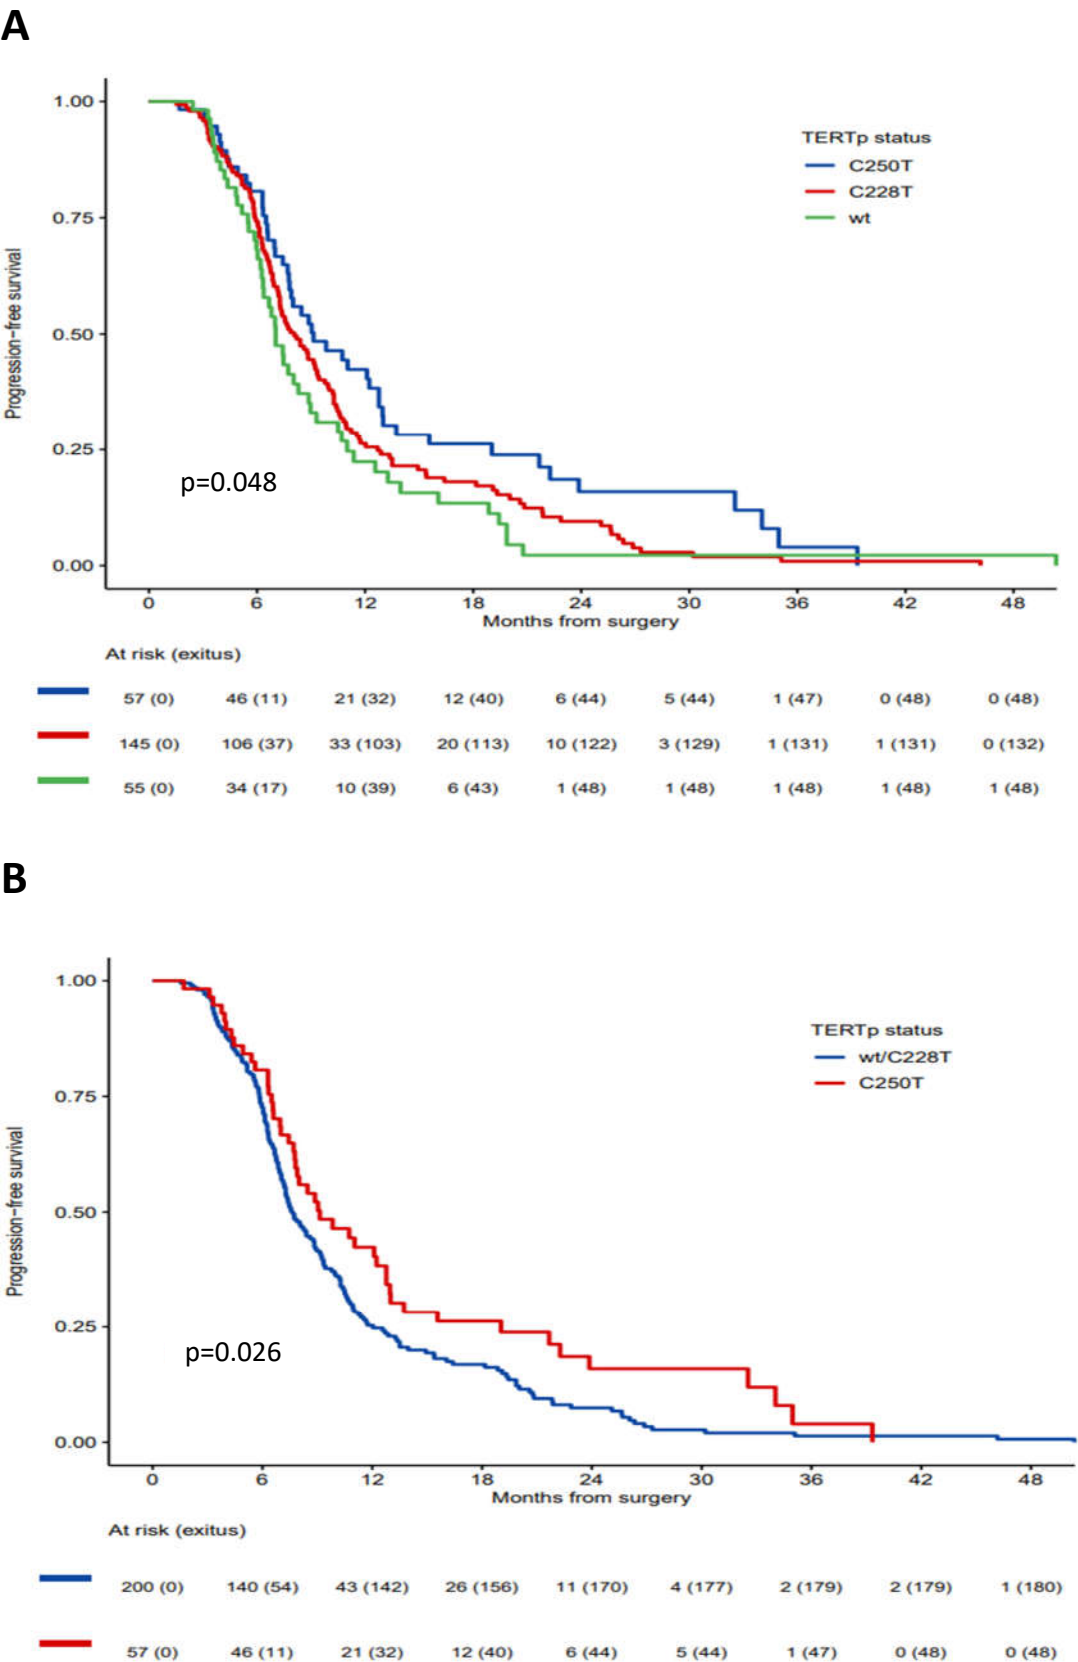

**Supplementary Figure S4.** TERT RNA expression was assessed in relation to TERTp mutation status using the Kruskal-Wallis test. The results indicated no statistically significant differences across all comparative statuses (C228T vs C250T vs wt:  $p=0.25$ , C228T vs wt:  $p=0.1$ , C228T vs C250T:  $p=0.71$ , C250T vs wt:  $p=0.35$ ), as all p-values exceeded the threshold of 0.05.

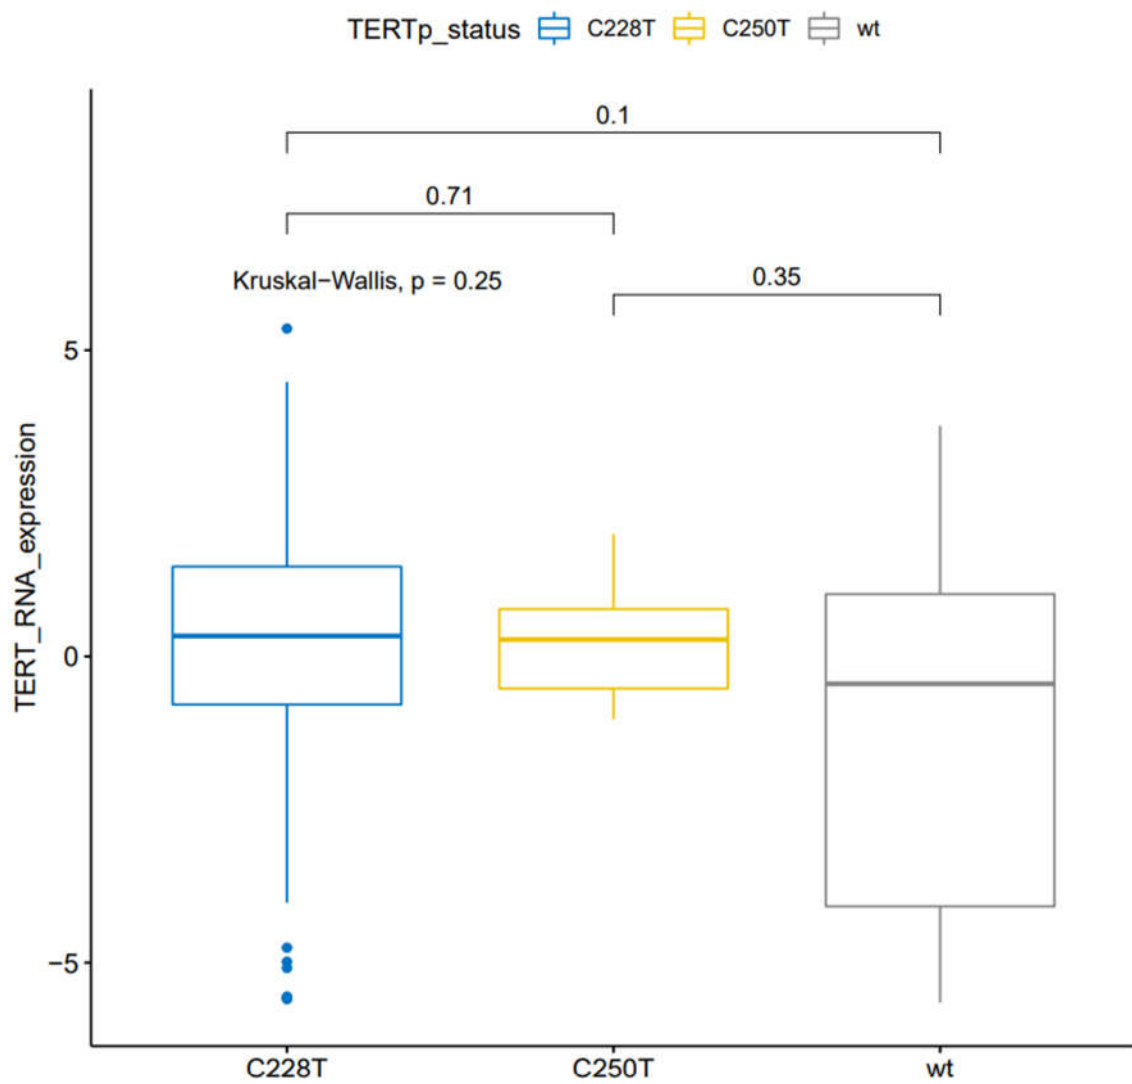

Supplement: Supplementary file 1 [file cancers-16-00735-s001.zip › cancers-2852183-supplementary.pdf]
